# Supplementary material for: Adsorption of low-concentration perfluorooctanoic acid on corn stover-based lignin amine by synergy of electrostatic and hydrophobic interactions
Source: Royal Society of Chemistry journal article supplement (doi:10.1039/d5nj00678c), 2025-01-01
Supplement: d5nj00678c1.pdf [file d5nj00678c1.pdf]

1 **Supplemental file for:**

2 **Adsorption of trace perfluorooctanoic acid on corn stover-based lignin amine by**  
3 **synergy of electrostatic and hydrophobic interactions**

4 Baoyuan Shi <sup>a, b, c</sup>, Jun Dong <sup>a, b, c, \*</sup>, Yunhao Li <sup>a, b, c</sup>, Weihong Zhang <sup>a, b, c</sup>, Yongxin Li <sup>a, b, c</sup>

5 <sup>a</sup> Key Lab of Groundwater Resources and Environment Ministry of Education, Jilin University,  
6 China

7 <sup>b</sup> Jilin Provincial Key Laboratory of Water Resources and Water Environment, Jilin University,  
8 China

9 <sup>c</sup> National and Local Joint Engineering Laboratory for Petrochemical Contaminated Site Control  
10 and Remediation Technology, Jilin University, China

11 Corresponding Author: Jun Dong. Email: dongjun@jlu.edu.cn

12

13 **SUPPLEMENTARY NOTES**

14 Supplementary Note 1 | The formulas of removal rate and adsorption capacity of  
15 PFOA by CSLA:

16 The removal rate of CSLA towards PFOA ( $R$ , %) and the mass of PFOA  
17 adsorbed by unit mass of CSLA at desired time ( $q_t$ , mg/g) and equilibration time ( $q_e$ ,  
18 mg/g) were calculated according to the following equations (1–3):

19 
$$R\% = \frac{C_0 - C_e}{C_0} \times 100\% \quad (1)$$

20 
$$q_t = \frac{(C_0 - C_t)V}{m} \quad (2)$$

21 
$$q_e = \frac{(C_0 - C_e)V}{m} \quad (3)$$

22       Where  $C_0$ ,  $C_t$  and  $C_e$  (mg/L) denote the initial, immediate and final PFOA  
23 concentrations, respectively;  $V$  (L) stands for the volume of the PFOA solution used,  
24 and  $m$  (mg) presents the weight of CSLA.

25

26 Supplementary Note 2 | Measurement and analysis:

27       This study used scanning electron microscopy (SEM, Hitachi Regulus 8100,  
28 Japan) and energy dispersive X-Ray spectrometer (EDS, Ultim Max 65, UK) to  
29 observe the surface morphology and element weight ratio of CSLA; the element  
30 content analysis and valence state calibration of CSLA were performed by X-ray  
31 photoelectron spectroscopy (XPS, Thermo fisher Nexsa G2, USA); fourier transform  
32 infrared spectroscopy (FTIR, Thermo Fisher Scientific Nicolet iS5, USA) was used to  
33 evaluate types of surface functional groups and chemical bonds of CSLA in KBr flake;  
34 the surface potentials were determined by a Nano particle potential analyzer  
35 (Zetasizer Nano S90, Malvern, UK); thermal stability of CSLA was measured using  
36 thermal gravimetric analyzer (TGA, TA TGA 550, USA); the surface area and  
37 porosity analyzer (BET, Micromeritics 3FLEX, USA) was used to gauge the specific  
38 surface area of CSLA.

39       The concentration of PFOA in the solution was measured by High-Performance  
40 Liquid Chromatography Mass Spectrometry (U3000/TSQ quantum). The instrument  
41 test conditions of Liquid Chromatography are as follows: the mobile phase is 5  
42 mmol/L ammonium acetate aqueous solution and acetonitrile (30:70, V/V); the  
43 injection volume is 1  $\mu$ L; the column temperature is 40°C; the flow rate is 0.15

44 mL/min. The mass spectrometer used the anion mode HESI ion source. The scanning  
45 conditions were: the ion source temperature was 350°C; the ion source voltage was  
46 3000 V, the ion transport tube temperature was 350°C; the sheath gas pressure was 35  
47 bar; the auxiliary gas pressure was 10 bar.

48

## 49 SUPPLEMENTARY FIGURES

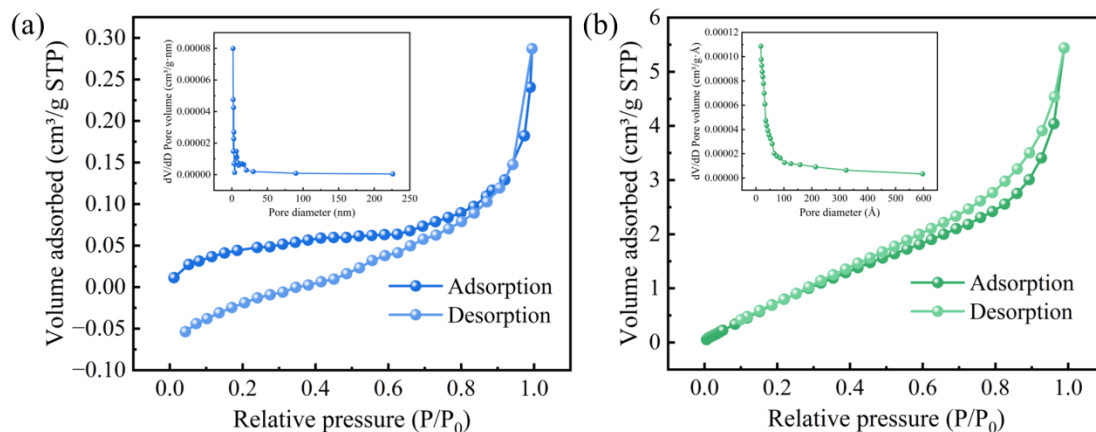

51 Fig. S1. The  $N_2$  adsorption-desorption isotherms of (a) lignin and (b) CSLA.

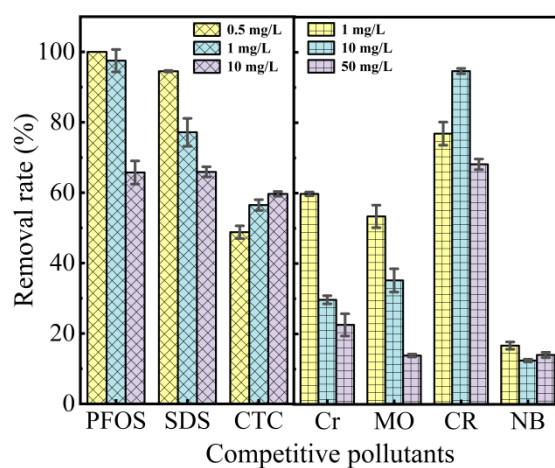

54 Fig. S2. Removal rate of competitive pollutants by CSLA

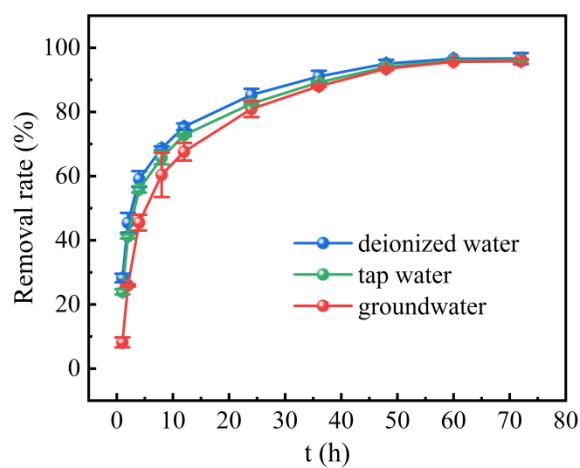

57 Fig. S3. The adsorption of PFOA on CSLA in actual water.

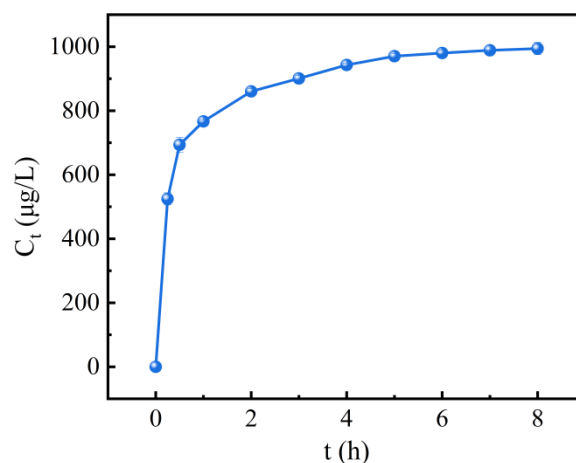

58

59 Fig. S4. Desorption efficiency experiment.

60 The react conditions of the adsorption test are: the initial concentration of PFOA  
 61 was 1000 μg/L, the volume of PFOA solution was 50 mL, and the addition amount of  
 62 CSLA was 5 mg. In order to obtain the desorption efficiency of PFOA by the mixed  
 63 solution of 1% NaCl and 70% methanol, the adsorbed and dried CSLA was added to  
 64 50 mL mixed solution for desorption. The concentration of PFOA in the mixed  
 65 solution was monitored during the desorption process, and it was found that the  
 66 desorption equilibrium was reached after 6 h. The concentration of PFOA in the  
 67 mixed solution at desorption equilibrium was 994.05 μg/L, and the desorption rate  
 68 reached 99.41%, indicating that the mixed solution of 1% NaCl and 70% methanol  
 69 has a good desorption effect on PFOA.

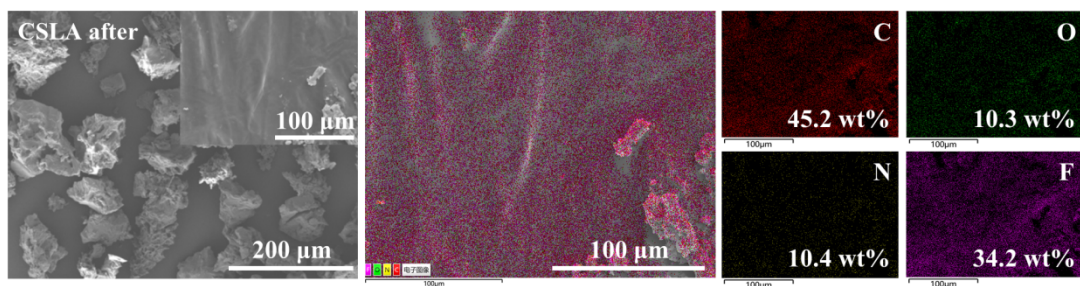

70

71 Fig. S5. The SEM-EDS images of PFOA adsorbed CSLA.

72

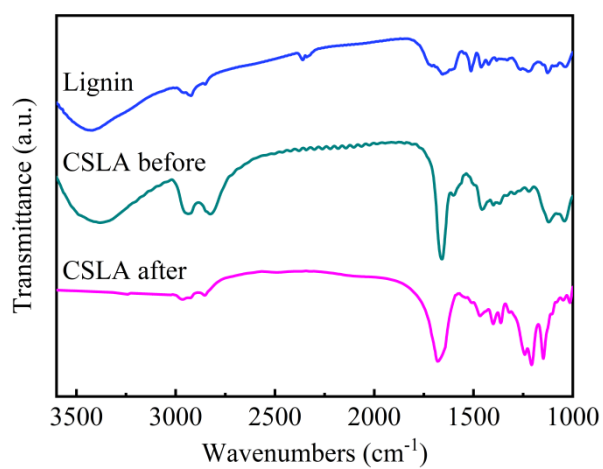

73

74 Fig. S6. Complete FTIR spectra of lignin and CSLA before and after adsorption of

75 PFOA.

## 76 SUPPLEMENTARY TABLES

77 Table S1. Adsorption kinetic models.

| Model                    | Nonlinear equation                              | Parameters                                                                                                                                                                              |
|--------------------------|-------------------------------------------------|-----------------------------------------------------------------------------------------------------------------------------------------------------------------------------------------|
| Pseudo-first-order       | $q_t = q_e(1 - e^{-k_1 t})$                     | $q_e$ and $q_t$ (mg/g) are the adsorbed amount at an equilibrium concentration ( $C_e$ , mg/g) and a predetermined time (t, h) $k_1$ ( $h^{-1}$ ) is the rate constants.                |
| Pseudo-second-order      | $q_t = \frac{k_2 q_e^2 t}{1 + k_2 q_e t}$       | $k_2$ (g/(mg·h)) is the rate constants for the pseudo-second order.                                                                                                                     |
| Elovich                  | $q_t = \frac{1}{\beta} \ln(1 + \alpha \beta t)$ | $\alpha$ (mg/(g·h)) is the initial rate constant, $\beta$ (mg/g) is the desorption constant.                                                                                            |
| Intra-particle diffusion | $q_t = K_i t^{1/2} + C_i$                       | $K_i$ (mg/(g·h <sup>0.5</sup> )) is the adsorption rate constants of intra-particle diffusion model and $C_i$ is the constant for film thickness of the intra-particle diffusion model. |

79 Table S2. Adsorption isotherm models and adsorption thermodynamics equation.

| Model                     | Nonlinear equation                                                             | Parameters                                                                                                                                                                                                                                                                                                                                                                                                                                                            |
|---------------------------|--------------------------------------------------------------------------------|-----------------------------------------------------------------------------------------------------------------------------------------------------------------------------------------------------------------------------------------------------------------------------------------------------------------------------------------------------------------------------------------------------------------------------------------------------------------------|
| Langmuir                  | $q_e = \frac{q_{\max} K_L C_e}{1 + K_L C_e}$                                   | $q_{\max}$ (mg/g) is the maximum adsorption capacity of the adsorbent, $q_e$ (mg/g) is the adsorption capacity at equilibrium, $C_e$ (mg/L) is the adsorbate concentration at equilibrium, $K_L$ (L/mg) is the constant for the affinity between the adsorbate and the adsorbent.                                                                                                                                                                                     |
| Freundlich                | $q_e = K_F C_e^{1/n}$                                                          | $K_F$ (mg/g)·(L/mg) <sup>1/n</sup> is the Freundlich constant, $n$ is a dimensionless Freundlich intensity parameter.                                                                                                                                                                                                                                                                                                                                                 |
| Adsorption thermodynamics | $\Delta G^0 = -RT \ln \frac{q_e}{C_e}$ $\Delta G^0 = \Delta H^0 - T\Delta S^0$ | <p><math>R</math> is the universal gas constant (8.314 J/mol·K), <math>T</math> is the absolute temperature (K), <math>q_e</math> (mg/g) is the adsorption capacity at equilibrium, and <math>C_e</math> (mg/L) is the adsorbate concentration at equilibrium.</p> <p>The values of <math>\Delta S^0</math> and <math>\Delta H^0</math> were obtained from the intercept and slope of the line that was plotted by <math>\Delta G^0</math> versus <math>T</math>.</p> |



81 Table S3. The parameters of adsorption kinetics models and intra-particle diffusion model.

| Parameters                       | PFOA solution ( $\mu\text{g/L}$ ) |        |        |
|----------------------------------|-----------------------------------|--------|--------|
|                                  | 250                               | 500    | 1000   |
| Pseudo first-order               |                                   |        |        |
| $q_e$ (mg/g)                     | 4.74                              | 9.49   | 19.33  |
| $k_1$ ( $\text{h}^{-1}$ )        | 0.87                              | 0.63   | 0.16   |
| $R^2$                            | 0.9175                            | 0.9648 | 0.9387 |
| Pseudo second-order              |                                   |        |        |
| $q_e$ (mg/g)                     | 4.91                              | 9.91   | 20.16  |
| $k_1$ ( $\text{h}^{-1}$ )        | 0.32                              | 0.10   | 0.01   |
| $R^2$                            | 0.9902                            | 0.9764 | 0.9891 |
| Elovich                          |                                   |        |        |
| $\alpha$ (mg/(g·h))              | 10191.80                          | 873.96 | 56.68  |
| $\beta$                          | 2.93                              | 1.11   | 0.39   |
| $R^2$                            | 0.8154                            | 0.7870 | 0.9627 |
| Intra-particle diffusion         |                                   |        |        |
| $K_1$ (mg/(g·h <sup>1/2</sup> )) | 1.04                              | 3.55   | 6.29   |
| $C_1$ (mg/g)                     | 2.26                              | 1.42   | -0.56  |
| $R^2$                            | 0.8976                            | 0.9751 | 0.9862 |
| $K_2$ (mg/(g·h <sup>1/2</sup> )) | 0.23                              | 0.43   | 1.34   |
| $C_2$ (mg/g)                     | 3.81                              | 7.67   | 10.04  |
| $R^2$                            | 0.9490                            | 0.9905 | 0.9794 |
| $K_3$ (mg/(g·h <sup>1/2</sup> )) | 0.03                              | 0.09   | 0.17   |
| $C_3$ (mg/g)                     | 4.60                              | 8.98   | 17.87  |
| $R^2$                            | 0.9652                            | 0.9830 | 0.9945 |

83 Table S4. The parameters of adsorption isotherm models and adsorption thermodynamics.

| T              |                                   | 283 K  | 293 K  | 303 K   |
|----------------|-----------------------------------|--------|--------|---------|
| Langmuir       | $q_{\max}$ (mg/g)                 | 426.87 | 654.11 | 1018.10 |
|                | $K_L$ (L/mg)                      | 0.07   | 0.10   | 0.22    |
|                | $R^2$                             | 0.9970 | 0.9942 | 0.9911  |
| Freundlich     | $K_F$ (mg/g)(L/mg) <sup>1/n</sup> | 51.10  | 95.78  | 219.86  |
|                | n                                 | 1.93   | 1.99   | 2.02    |
|                | $R^2$                             | 0.9941 | 0.9940 | 0.9881  |
| Thermodynamics | $\Delta G^0$ (kJ/mol)             | -10.56 | -15.08 | -18.12  |
|                | $\Delta H^0$ (kJ/mol)             |        | 96.22  |         |
|                | $\Delta S^0$ (kJ/(mol·K))         |        | 0.38   |         |

85 Table S5. Concentrations of contaminants in CSLA leaching solution.

| Samples       | Mass concentration / $\text{mg}\cdot\text{L}^{-1}$ | Standard / $\text{mg}\cdot\text{L}^{-1}$ |
|---------------|----------------------------------------------------|------------------------------------------|
| $\text{Cl}^-$ | 0.05224                                            | 50 <sup>a</sup>                          |
| Formaldehyde  | 0.07903                                            | 0.9 <sup>b</sup>                         |

86 a Category I standard of *Standard for groundwater quality* (GB/T 14848-2017)

87 b Standard limits for specific projects of centralized drinking water surface water sources of

88 *Environmental quality standards for surface water* (GB 3838-2002)

89

90 Table S6. Comparison of PFOA adsorption on different adsorbents.

| Material                            | $C_0$<br>( $\mu\text{g/L}$ ) | T<br>(K) | pH  | R<br>(%) | $q_e^a$<br>(mg/g) | $q_{\max}^b$<br>(mg/g) | Reference    |
|-------------------------------------|------------------------------|----------|-----|----------|-------------------|------------------------|--------------|
| calcium-based MOF                   | 10                           | -        | 7.0 | 72.00    | 0.0038            | 0.061                  | <sup>1</sup> |
| MWNTs                               | 100                          | 297      | 6.5 | 65.00    | 0.00094           | 0.0035                 | <sup>2</sup> |
| Alumina                             | 100                          | 297      | 4.3 | -        | 0.0049            | 0.014                  | <sup>3</sup> |
| Carbon nanotube<br>sponge           | 100                          | 297      | -   | 75.00    | 1.52              | -                      | <sup>4</sup> |
| Boehmite                            | 200                          | 297      | 7.0 | -        | 0.027             | 0.19                   | <sup>5</sup> |
| AE-APTMS@ $\text{gFe}_2\text{O}_3$  | 1000                         | 297      | -   | 65.00    | 3.30              | 12.06                  | <sup>6</sup> |
| MOF ( $\text{In}_2\text{O}_3$ -400) | 20000                        | 297      | 4.6 | -        | 25.45             | -                      | <sup>7</sup> |
| CS_MBC                              | 50000                        | 297      | 3.5 | 63.42    | 158.55            | 517.00                 | <sup>8</sup> |
| PEI-PVC NF                          | 100000                       | 297      | 7.0 | 51.20    | 175.01            | 223.36                 | <sup>9</sup> |
|                                     | 250                          |          |     | 99.03    | 4.95              |                        |              |
| CSLA                                | 500                          | 293      | 6.0 | 99.31    | 9.93              | 654.11                 | This study   |
|                                     | 1000                         |          |     | 98.45    | 19.69             |                        |              |

91 a The  $q_e$  is the saturated adsorption capacity obtained from the adsorption kinetics  
92 experiment.

93 b The  $q_{\max}$  is the maximum adsorption capacity of the material obtained by Langmuir  
94 model fitting in the adsorption isotherm experiment.

95 References:

- 96 1 F. F. Sukatis, M. R. Razak, L. J. Looi, H. N. Lim, M. B. Abdul Rahman and A. Z.  
97 Aris, *Microporous Mesoporous Mat.*, 2024, **380**, 113316.
- 98 2 X. N. Li, S. Chen, X. Quan and Y. B. Zhang, *Environ. Sci. Technol.*, 2011, **45**,  
99 8498-8505.
- 100 3 F. Wang and K. Shih, *Water Res.*, 2011, **45**, 2925-2930.
- 101 4 A. Xue, Z. W. Yuan, Y. Sun, A. Y. Cao and H. Z. Zhao, *Chemosphere*, 2015, **141**,  
102 120-126.
- 103 5 F. Wang, C. Liu and K. Shih, *Chemosphere*, 2012, **89**, 1009-1014.
- 104 6 D. Y. Xing, Y. Chen, J. Zhu and T. Liu, *Chemosphere*, 2020, **251**, 126384.
- 105 7 X. Gao, J. Chen, H. A. Che, Y. H. Ao and P. F. Wang, *ACS ES&T Wat.*, 2022, **2**,  
106 1344-1352.
- 107 8 B. Saawarn, B. Mahanty and S. Hait, *Environ. Pollut.*, 2025, **368**, 125734.
- 108 9 S. B. Kang, Z. Wang, W. Zhang, K.-Y. Kim and S. W. Won, *Sep. Purif. Technol.*,  
109 2023, **326**, 124853.
- 110
